# Supplementary material for: Profiles of Accelerometry-Derived Physical Activity Are Related to Perceived Physical Fatigability in Older Adults
Source: MDPI journal article supplement (doi:10.3390/s21051718), 2021-03-02
Supplement: s1 [file s1]

## Supplemental Material

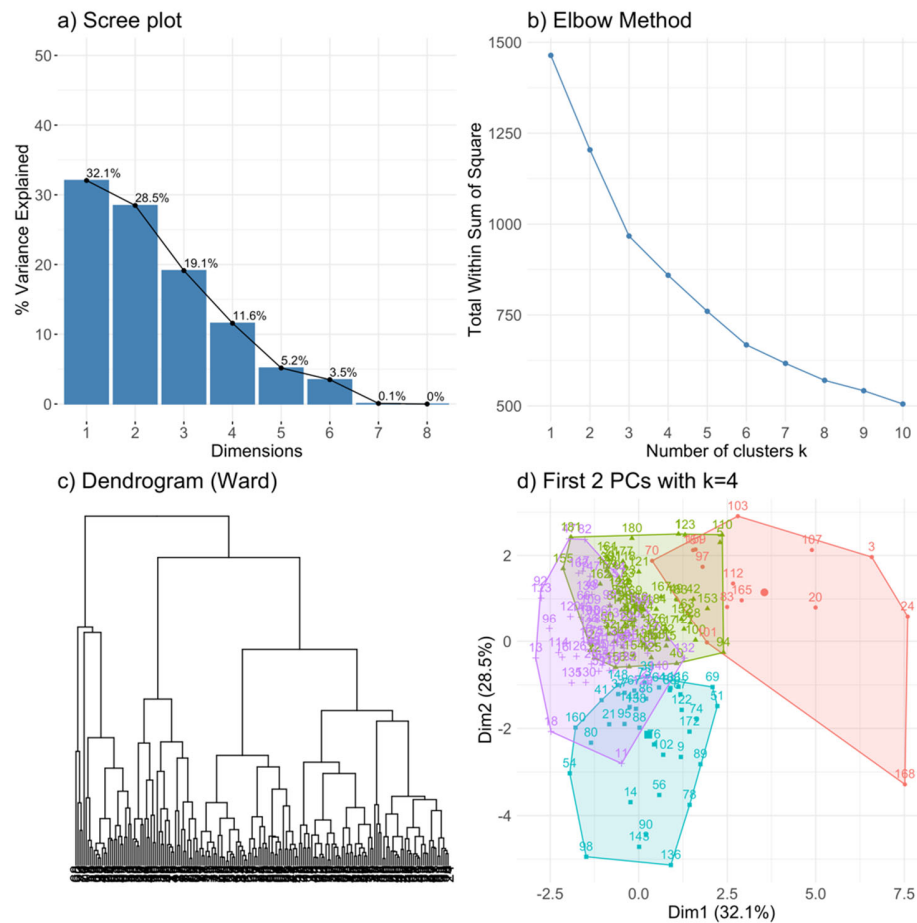

Figure S1. k-means clustering diagnostics for 4 clusters.

a) percent of variance explained from principal components analysis (PCA); b) “Elbow method” of within sum of squares estimated by different cluster k assignments; c) Ward method dendrogram; d): visualization of first two dimension of PCA analysis with cluster assignments overlaid.

Table S1. Cohen's D effect sizes for demographic and RAR characteristics based on Pittsburgh Fatigability Scale (PFS) perceived physical fatigability status (PFS Physical Score  $\geq 15$  versus PFS Physical Score  $< 15$ ).

|                                         | <b>Cohen's D Effect Size<br/>(95% CI)</b> |
|-----------------------------------------|-------------------------------------------|
| <b>Demographic Characteristics</b>      |                                           |
| Age                                     | -0.18 (-0.48, 0.12)                       |
| Short Physical Performance Battery      | -0.31 (-0.62, 0.00)                       |
| Body mass index, kg/m <sup>2</sup>      | 0.57 (0.26, 0.88)                         |
| Usual Gait Speed, m/s                   | -0.88 (-1.21, -0.54)                      |
| Physical activity (CHAMPS), MET-min/day | -0.29 (-0.60, 0.01)                       |
| Depression symptomology (CES-D), 0-30   | 0.52 (0.20, 0.83)                         |
| <b>RAR characteristics</b>              |                                           |
| # of observation days                   | -0.50 (-0.81, -0.19)                      |
| Alpha                                   | 0.23 (-0.08, 0.53)                        |
| Beta                                    | 0.19 (-0.11, 0.49)                        |
| Acrophase                               | 0.25 (-0.06, 0.55)                        |
| Amplitude                               | -0.27 (-0.57, 0.03)                       |
| Mesor                                   | -0.19 (-0.49, 0.11)                       |
| Up Mesor (hours)                        | 0.45 (0.14, 0.76)                         |
| Down Mesor (hours)                      | 0.04 (-0.26, 0.33)                        |
| Pseudo-F Statistic                      | -0.18 (-0.48, 0.12)                       |
